# Supplementary material for: Boosting the Energetic Performance of Trinitromethyl-1,2,4-oxadiazole Moiety by Increasing Nitrogen-Oxygen in the Bridge
Source: MDPI journal article supplement (doi:10.3390/ijms231710002), 2022-09-02
Supplement: s1 [file s1]

# Supplementary Materials

## Boosting the Energetic Performance of Trinitrome-thyl-1,2,4-oxadiazole Moiety by Increasing Nitrogen-Oxygen in the Bridge

Peng Chen,<sup>1,2</sup> Hui Dou,<sup>1,2</sup> Chunlin He,<sup>1,2,3,4\*</sup> and Siping Pang<sup>1,\*</sup>

<sup>1</sup> School of Materials Science & Engineering, Beijing Institute of Technology, Beijing 10081, China

<sup>2</sup> Experimental Center of Advanced Materials, School of Materials Science & Engineering, Beijing Institute of Technology, Beijing 10081, China;

<sup>3</sup> Yangtze Delta Region Academy of Beijing Institute of Technology, Jiaxing 314019, China.

<sup>4</sup> Chongqing Innovation Center, Beijing Institute of Technology, Chongqing 401120, China.

\* Correspondence: chunlinhe@bit.edu.cn (C.H.); pangsp@bit.edu.cn (S.P.)

### Table of Contents

|                                                           |   |
|-----------------------------------------------------------|---|
| Crystal data and structure refinement .....               | 1 |
| <sup>13</sup> C NMR and <sup>15</sup> N NMR spectra ..... | 2 |
| Differential scanning calorimetry (DSC) scans .....       | 3 |
| Fourier Transform Infrared (FT-IR) .....                  | 3 |
| Gaussian Calculation .....                                | 4 |

## Crystal data and structure refinement

**Table S1** Crystal data and structure refinement for **2**.

|                                                              |                                                                              |
|--------------------------------------------------------------|------------------------------------------------------------------------------|
| Identification code                                          | <b>2</b>                                                                     |
| CCDC number                                                  | 2182869                                                                      |
| Empirical formula                                            | C <sub>10</sub> N <sub>16</sub> O <sub>16</sub>                              |
| Formula weight                                               | 600.26                                                                       |
| Temperature/K                                                | 170                                                                          |
| Crystal system                                               | triclinic                                                                    |
| Space group                                                  | <i>P</i> -1                                                                  |
| <i>a</i> /Å                                                  | 9.8874(8)                                                                    |
| <i>b</i> /Å                                                  | 10.4237(10)                                                                  |
| <i>c</i> /Å                                                  | 11.3885(9)                                                                   |
| $\alpha$ /°                                                  | 116.162(3)                                                                   |
| $\beta$ /°                                                   | 95.794(3)                                                                    |
| $\gamma$ /°                                                  | 91.412(4)                                                                    |
| Volume/Å <sup>3</sup>                                        | 1044.96(16)                                                                  |
| <i>Z</i>                                                     | 2                                                                            |
| $\rho_{\text{calc}}/\text{cm}^3$                             | 1.908                                                                        |
| $\mu/\text{mm}^{-1}$                                         | 0.182                                                                        |
| <i>F</i> (000)                                               | 600.0                                                                        |
| Crystal size/mm <sup>3</sup>                                 | 0.08 × 0.06 × 0.04                                                           |
| Radiation                                                    | MoK $\alpha$ ( $\lambda$ = 0.71073)                                          |
| 2 $\Theta$ range for data collection/°                       | 4.016 to 52.956                                                              |
| Index ranges                                                 | -12 ≤ <i>h</i> ≤ 11, -12 ≤ <i>k</i> ≤ 13, -14 ≤ <i>l</i> ≤ 14                |
| Reflections collected                                        | 12351                                                                        |
| Independent reflections                                      | 4289 [ <i>R</i> <sub>int</sub> = 0.0715, <i>R</i> <sub>sigma</sub> = 0.0782] |
| Data/restraints/parameters                                   | 4289/0/379                                                                   |
| Goodness-of-fit on <i>F</i> <sup>2</sup>                     | 1.047                                                                        |
| Final <i>R</i> indexes [ <i>I</i> ≥ 2 $\sigma$ ( <i>I</i> )] | <i>R</i> <sub>1</sub> = 0.0463, <i>wR</i> <sub>2</sub> = 0.1003              |
| Final <i>R</i> indexes [all data]                            | <i>R</i> <sub>1</sub> = 0.0783, <i>wR</i> <sub>2</sub> = 0.1197              |
| Largest diff. peak/hole / e Å <sup>-3</sup>                  | 0.26/-0.31                                                                   |

### <sup>13</sup>C NMR and <sup>15</sup>N NMR spectra

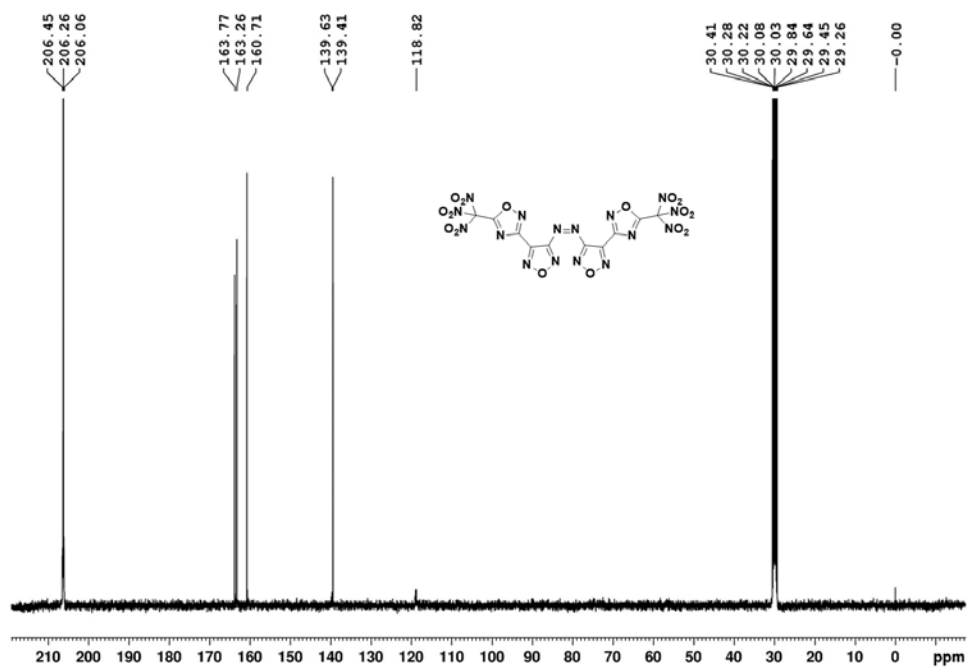

**Figure S1.**  $^{13}\text{C}$  NMR of **2**.

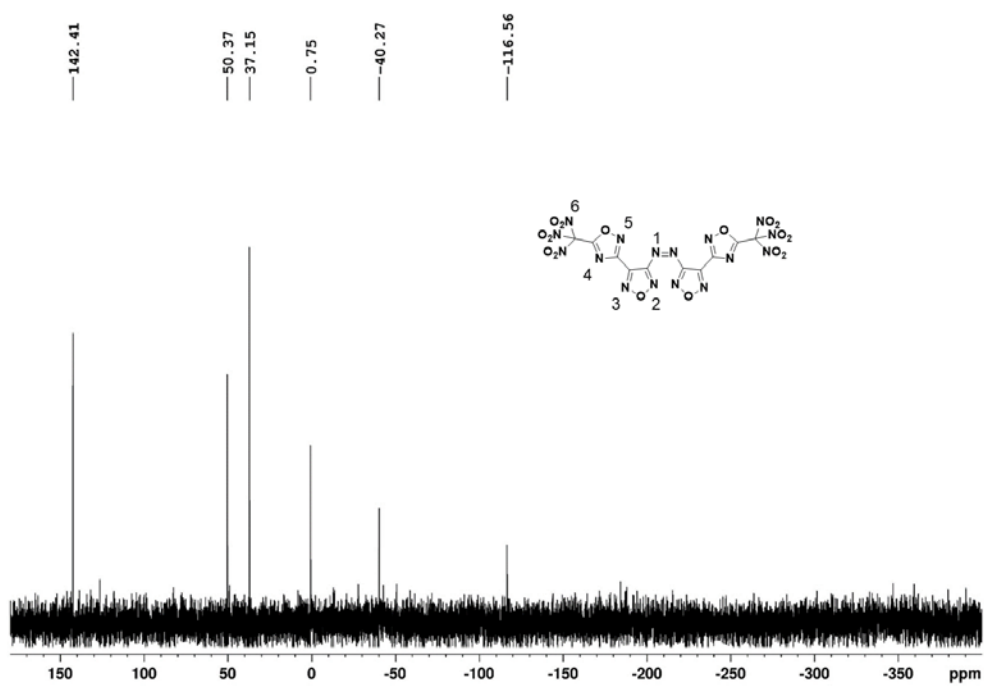

**Figure S2.**  $^{15}\text{N}$  NMR of **2**.

## Differential scanning calorimetry (DSC) scans

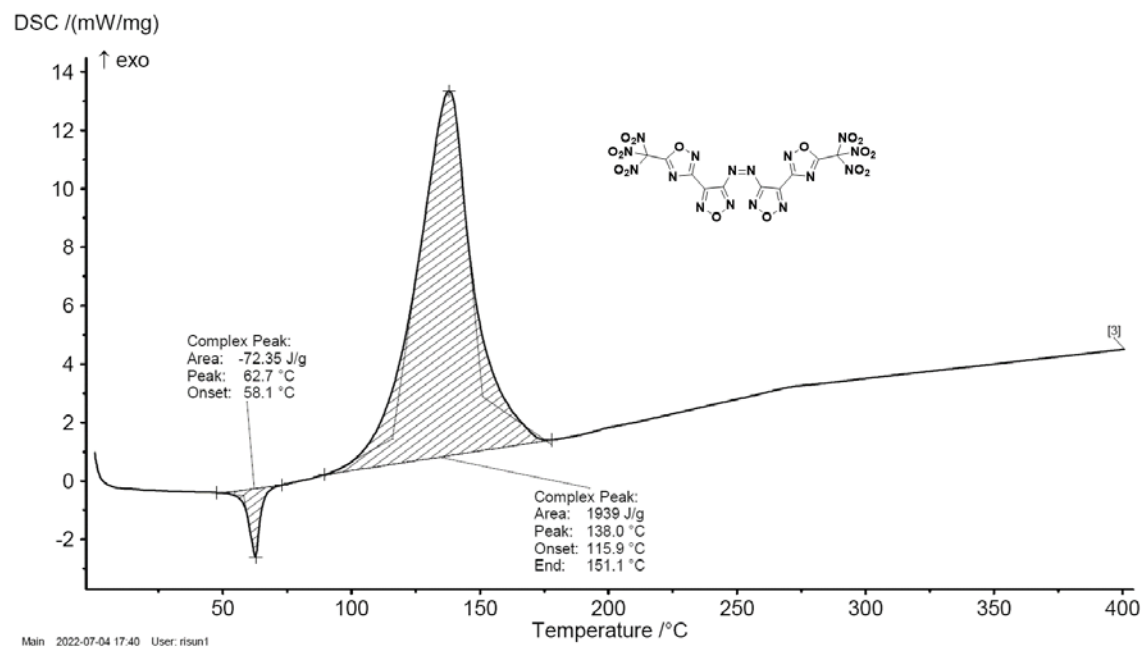

**Figure S3.** DSC curves of 2 under nitrogen with a heating rate of 5 °C min<sup>-1</sup>

## Fourier Transform Infrared (FT-IR)

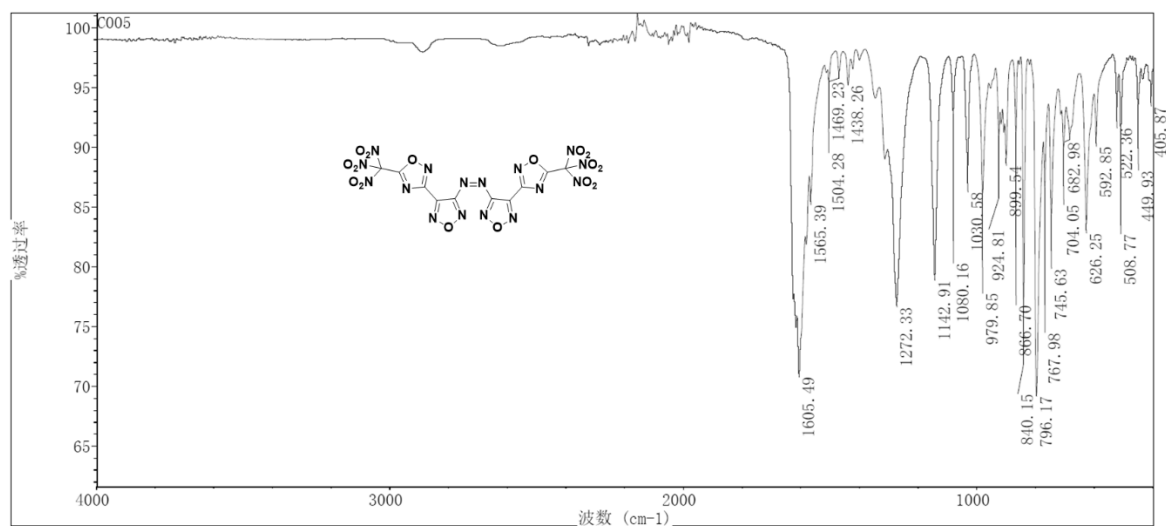

**Figure S4.** FT-IR curves of 2

## Gaussian Calculation

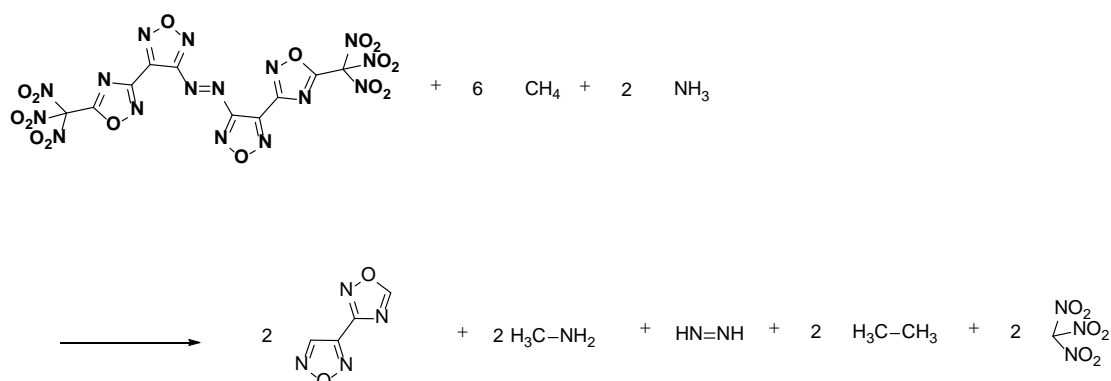

**Scheme S1.** Isodesmic reactions for calculating heats of formation for the anions of **2**.

**Table S2.** Calculated (B3LYP-D3BJ/6-31+G(d,p) // M062x/def2QZVPP) total energy( $E_0$ ), zero-point energy ( $ZPE$ ), values of the correction ( $H_r$ ), and heats of formation (HOF) for anions.

|                                 | $ZPE$    | $H_r$    | $E_0$        | Corrected $E_0$ | HOF (KJ mol <sup>-1</sup> ) |
|---------------------------------|----------|----------|--------------|-----------------|-----------------------------|
|                                 | 0.072807 | 0.080642 | -522.9863084 | -522.90858      | 306.17 <sup>b</sup>         |
| CH <sub>3</sub> CH <sub>3</sub> | 0.074962 | 0.079382 | -79.8143982  | -79.73801       | -84 <sup>a</sup>            |
| N <sub>2</sub> H <sub>2</sub>   | 0.028522 | 0.032322 | 110.6471796  | -110.61600      | 200.41 <sup>b</sup>         |
| CH <sub>3</sub> NH <sub>2</sub> | 0.064305 | 0.068654 | -95.8543147  | -95.78823       | -23 <sup>a</sup>            |
| CH <sub>4</sub>                 | 0.045014 | 0.048823 | -40.5062133  | -40.45919       | -74.6 <sup>a</sup>          |
| NH <sub>3</sub>                 | 0.034517 | 0.038327 | -56.5578458  | -56.52090       | -45.9 <sup>a</sup>          |
| Nitrofrom                       | 0.054646 | 0.064483 | -654.0296587 | -653.96736      | -27.74 <sup>b</sup>         |
| <b>2</b>                        | 0.201407 | 0.237123 | -2459.86609  | -2459.63702     | 1047.07 <sup>b</sup>        |

<sup>a</sup> Data from NIST, <sup>b</sup> Calculated from G2.

**Table S3.** Calculation of Heat of formation by Atomization G2

|                               | $E_{298}$ (G2) | MW       | $D_0$ (Hartree) | $\Delta H_f^{298}$ (Kcal/mol) | $\Delta H_f^{298}$ (KJ/mol) |
|-------------------------------|----------------|----------|-----------------|-------------------------------|-----------------------------|
|                               | -522.2         | 138.0844 | 2.022031        | 73.17633821                   | 306.1697991                 |
| N <sub>2</sub> H <sub>2</sub> | -110.48        | 30.02936 | 0.440344        | 47.89995673                   | 200.413419                  |
| Nitrofrom                     | -653.18        | 151.0353 | 1.448821        | -6.6289413                    | -27.7354904                 |

Solid-state heats of formation of the resulting compound **2** were calculated with Equation (S1) in which  $T_{dec}$  is the decomposition temperature.

$$\Delta H_f = \Delta H_f(g) - \Delta H_{sub} = \Delta H_f(g) - 188[\text{J mol}^{-1} \text{K}^{-1}] \times T_m \dots\dots\dots (S1)$$
